# Supplementary material for: Expanding Paramedicine in the Community (EPIC): study protocol for a randomized controlled trial
Source: PubMed Central journal article supplement (PMC4289358; doi:10.1186/1745-6215-15-473), 2014-12-02
Supplement: 13063_2014_2337_MOESM1_ESM.pdf [file 13063_2014_2337_MOESM1_ESM.pdf]

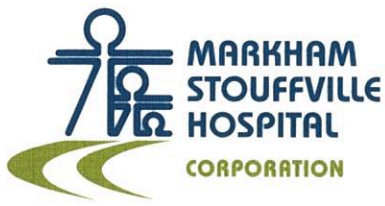

April 23, 2013

Dr. Jane Philpott  
379 Church Street, Ste. 202  
Markham, ON  
L6B 0T1

Dear Dr. Philpott:

**Re: Expanding Paramedicine in the Community (EPIC)**

The Research Ethics Board of Markham Stouffville Hospital has reviewed and approved the above study on February 12, 2013.

The quorum for approval did not include any member associated with this project.

If during the course of the research, changes in the approved submission or any new information that must be considered with respect to the study, these should be brought to the immediate attention of the Research Ethics Board.

All members of the Board wish you success in your research endeavours and look forward to continued follow-up regarding progress with this study.

Yours sincerely,

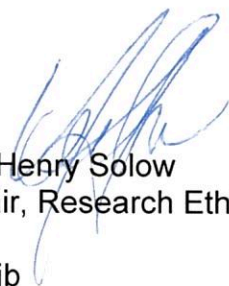

Dr. Henry Solow  
Chair, Research Ethics Board

HS/jb

c.  
L. Gatttoni, RESCU

381 Church St PO Box 1800  
Markham Ontario L3P 7P3  
905.472.7000
